# Supplementary material for: A Transposon Screen Identifies Loss of Primary Cilia as a Mechanism of Resistance to SMO Inhibitors
Source: Oxford University Press journal article supplement (doi:10.1158/2159-8290.cd-17-0281), 2017-09-18
Supplement: 21598290cd170281-sup-180587_2_supp_4253442_lvv71x.xlsx [file 21598290cd170281-sup-180587_2_supp_4253442_lvv71x.xlsx]

## Sheet: table_s1
Clone_ID	Chr	Pos	Transposon_direction	Inserted_region	Strand	Biotype
R1	10	61769141	+	H2afy2	-	protein_coding
R1	19	46453700	+	Sufu	+	protein_coding
R1	3	150449775	-	intergenic	N/A	intergenic
R10	19	46477732	-	Sufu	+	protein_coding
R10	2	127222462	+	Snrnp200	+	protein_coding
R11	1	36151047	+	intergenic	N/A	intergenic
R11	10	94147315	-	intergenic	N/A	intergenic
R11	2	36993835	+	intergenic	N/A	intergenic
R11	3	25913033	-	intergenic	N/A	intergenic
R11	8	99393788	+	intergenic	N/A	intergenic
R12	10	22997306	+	intergenic	N/A	intergenic
R12	12	117320738	-	intergenic	N/A	intergenic
R12	18	12949299	-	intergenic	N/A	intergenic
R12	19	46399508	-	Sufu	+	protein_coding
R12	19	61265807	+	intergenic	N/A	intergenic
R12	3	95950778	-	intergenic	N/A	intergenic
R12	4	124497632	+	intergenic	N/A	intergenic
R12	5	137464324	+	Zan	-	protein_coding
R13	19	46477732	-	Sufu	+	protein_coding
R14	14	67675300	-	intergenic	N/A	intergenic
R14	15	84168665	+	intergenic	N/A	intergenic
R14	3	101926140	+	intergenic	N/A	intergenic
R14	X	166440056	-	Ofd1	-	protein_coding
R15	15	84652310	-	intergenic	N/A	intergenic
R15	16	64872500	+	intergenic	N/A	intergenic
R15	16	77400719	-	2810055G20Rik	+	processed_transcript
R15	18	69502623	+	Tcf4	+	protein_coding
R15	18	71527140	-	Dcc	-	protein_coding
R15	19	46448116	-	Sufu	+	protein_coding
R15	9	34623415	-	intergenic	N/A	intergenic
R15	9	117117485	-	intergenic	N/A	intergenic
R16	14	67675300	-	intergenic	N/A	intergenic
R16	3	101926140	+	intergenic	N/A	intergenic
R16	4	62471201	+	intergenic	N/A	intergenic
R16	9	16296964	+	Fat3	-	protein_coding
R16	X	166440056	-	Ofd1	-	protein_coding
R17	1	8143192	-	intergenic	N/A	intergenic
R17	14	106778098	-	intergenic	N/A	intergenic
R17	15	94617725	-	intergenic	N/A	intergenic
R17	5	148929457	-	Katnal1	-	protein_coding
R18	12	7058779	+	intergenic	N/A	intergenic
R18	12	119937326	+	intergenic	N/A	intergenic
R18	19	46445978	-	Sufu	+	protein_coding
R18	4	139148753	-	intergenic	N/A	intergenic
R18	7	78755271	-	intergenic	N/A	intergenic
R18	9	15997813	-	Fat3	-	protein_coding
R19	18	79189096	+	intergenic	N/A	intergenic
R19	19	46415928	-	Sufu	+	protein_coding
R19	2	36399166	-	intergenic	N/A	intergenic
R19	5	123742564	+	Rsrc2	-	protein_coding
R2	15	43568369	+	intergenic	N/A	intergenic
R2	5	145223387	-	intergenic	N/A	intergenic
R20	1	195144186	+	Cr2	-	protein_coding
R20	4	117682567	-	intergenic	N/A	intergenic
R20	9	60978646	+	intergenic	N/A	intergenic
R20	9	68893365	+	intergenic	N/A	intergenic
R21	1	133183496	-	intergenic	N/A	intergenic
R21	9	120936048	-	Ctnnb1	+	protein_coding
R22	1	152677110	-	Rgl1	-	protein_coding
R22	15	84168665	+	intergenic	N/A	intergenic
R22	8	91278083	+	Rpgrip1l	-	protein_coding
R23	1	111596236	-	intergenic	N/A	intergenic
R23	1	136620880	+	intergenic	N/A	intergenic
R23	1	145187882	+	intergenic	N/A	intergenic
R23	11	17118675	+	intergenic	N/A	intergenic
R23	11	18013840	-	intergenic	N/A	intergenic
R23	11	42389754	+	intergenic	N/A	intergenic
R23	11	95666501	+	intergenic	N/A	intergenic
R23	12	5154914	+	Klhl29	-	protein_coding
R23	12	84691056	+	Syndig1l	-	protein_coding
R23	13	31627220	+	intergenic	N/A	intergenic
R23	15	42676849	-	Gm17473	+	lincRNA
R23	15	42825692	-	intergenic	N/A	intergenic
R23	15	70920096	-	intergenic	N/A	intergenic
R23	16	20097366	-	intergenic	N/A	intergenic
R23	16	37585460	-	Hgd	+	protein_coding
R23	16	41525205	+	intergenic	N/A	intergenic
R23	16	48892089	-	intergenic	N/A	intergenic
R23	16	62940546	-	intergenic	N/A	intergenic
R23	16	84504464	-	intergenic	N/A	intergenic
R23	17	37345924	-	intergenic	N/A	intergenic
R23	17	68409441	-	intergenic	N/A	intergenic
R23	18	62082455	-	intergenic	N/A	intergenic
R23	19	10101128	-	Fads2	-	protein_coding
R23	2	75353334	-	intergenic	N/A	intergenic
R23	2	75604165	-	intergenic	N/A	intergenic
R23	2	110907741	+	intergenic	N/A	intergenic
R23	3	68896332	+	Ift80	-	protein_coding
R23	3	69435824	+	intergenic	N/A	intergenic
R23	3	101534816	+	intergenic	N/A	intergenic
R23	3	104795870	-	Mov10	-	protein_coding
R23	3	107740876	-	intergenic	N/A	intergenic
R23	4	104971619	+	intergenic	N/A	intergenic
R23	4	138537032	-	intergenic	N/A	intergenic
R23	4	138866557	-	intergenic	N/A	intergenic
R23	5	82742225	+	intergenic	N/A	intergenic
R23	5	84291472	-	intergenic	N/A	intergenic
R23	5	84295562	-	intergenic	N/A	intergenic
R23	6	33200046	+	intergenic	N/A	intergenic
R23	6	72645333	-	intergenic	N/A	intergenic
R23	6	142792691	-	Gm766	-	protein_coding
R23	7	52640794	+	intergenic	N/A	intergenic
R23	7	112256886	-	Mical2	+	protein_coding
R23	7	114031396	+	Spon1	+	protein_coding
R23	9	27596340	+	intergenic	N/A	intergenic
R23	9	67539953	-	intergenic	N/A	intergenic
R24	15	11566183	-	intergenic	N/A	intergenic
R24	15	99644082	-	Racgap1	-	protein_coding
R25	1	153285402	-	Lamc1	-	protein_coding
R25	15	99601928	-	Aqp6	+	protein_coding
R25	X	166427067	-	Ofd1	-	protein_coding
R26	1	132007027	+	intergenic	N/A	intergenic
R26	10	4372224	-	Zbtb2	-	protein_coding
R26	2	106085088	-	intergenic	N/A	intergenic
R26	3	99257614	+	Tbx15	+	protein_coding
R26	4	55708504	+	intergenic	N/A	intergenic
R26	4	90408396	+	intergenic	N/A	intergenic
R26	9	97922520	-	Clstn2	-	protein_coding
R27	1	82530679	+	Col4a4	-	protein_coding
R27	1	89566694	-	intergenic	N/A	intergenic
R27	10	4372224	-	Zbtb2	-	protein_coding
R27	11	18013840	-	intergenic	N/A	intergenic
R27	16	94428442	+	Ttc3	+	protein_coding
R27	19	47537352	-	intergenic	N/A	intergenic
R27	2	5513581	+	Camk1d	-	protein_coding
R27	2	45515752	+	intergenic	N/A	intergenic
R27	2	133027882	-	intergenic	N/A	intergenic
R27	3	138546556	-	intergenic	N/A	intergenic
R27	4	55708504	+	intergenic	N/A	intergenic
R27	8	121726610	+	intergenic	N/A	intergenic
R3	1	98658116	+	intergenic	N/A	intergenic
R3	1	144334108	-	intergenic	N/A	intergenic
R3	11	20830325	-	Lgalsl	-	protein_coding
R3	19	46472030	+	Sufu	+	protein_coding
R3	2	58974740	-	intergenic	N/A	intergenic
R3	3	30207470	-	intergenic	N/A	intergenic
R3	4	26075138	+	intergenic	N/A	intergenic
R3	4	48472689	-	Tex10	-	protein_coding
R3	4	144930263	-	intergenic	N/A	intergenic
R4	12	99011364	-	intergenic	N/A	intergenic
R4	13	6114472	-	intergenic	N/A	intergenic
R4	13	18041320	+	intergenic	N/A	intergenic
R4	17	75576329	+	intergenic	N/A	intergenic
R4	19	46439869	-	Sufu	+	protein_coding
R4	4	84163173	-	intergenic	N/A	intergenic
R4	6	7316944	-	intergenic	N/A	intergenic
R4	6	73234617	+	intergenic	N/A	intergenic
R4	7	136403185	+	intergenic	N/A	intergenic
R4	9	23097903	+	intergenic	N/A	intergenic
R4	9	64441568	+	Megf11	+	protein_coding
R5	10	116629126	+	intergenic	N/A	intergenic
R5	11	41696710	+	intergenic	N/A	intergenic
R5	15	40947613	+	Zfpm2	+	protein_coding
R5	19	46456746	-	Sufu	+	protein_coding
R5	3	150449775	-	intergenic	N/A	intergenic
R5	6	144057286	+	intergenic	N/A	intergenic
R5	7	16947172	-	Pnmal2	+	protein_coding
R5	7	134412779	-	intergenic	N/A	intergenic
R5	9	41687551	+	intergenic	N/A	intergenic
R6	1	168108326	+	intergenic	N/A	intergenic
R6	1	190206739	-	Gm17566	+	antisense
R6	13	18118422	-	intergenic	N/A	intergenic
R6	15	7694415	+	intergenic	N/A	intergenic
R6	8	35366964	+	intergenic	N/A	intergenic
R7	10	66613862	-	intergenic	N/A	intergenic
R7	19	46481422	+	Sufu	+	protein_coding
R7	3	71797775	-	intergenic	N/A	intergenic
R7	7	121569499	+	intergenic	N/A	intergenic
R7	8	122018404	-	intergenic	N/A	intergenic
R8	12	108490856	-	intergenic	N/A	intergenic
R8	14	34474853	-	Bmpr1a	-	protein_coding
R8	19	46439869	-	Sufu	+	protein_coding
R8	3	123597145	-	Ndst3	-	protein_coding
R8	3	150449775	-	intergenic	N/A	intergenic
R9	14	72080516	+	intergenic	N/A	intergenic
R9	15	24303906	+	intergenic	N/A	intergenic
R9	16	41552282	-	Lsamp	+	protein_coding
R9	19	46471379	-	Sufu	+	protein_coding
R9	2	133946182	+	intergenic	N/A	intergenic
R9	2	178545808	+	intergenic	N/A	intergenic
R9	4	67144180	+	intergenic	N/A	intergenic
R9	9	75299158	-	Myo5c	+	protein_coding
